# Supplementary material for: Monoclonal Antibodies against Calcitonin Gene-Related Peptide for Migraine Prophylaxis: A Systematic Review of Real-World Data
Source: MDPI journal article supplement (doi:10.3390/cells12010143), 2022-12-29
Supplement: s1 [file s1]

**Supplementary Table S1.** Characteristics reported in clinic-based studies.

[illegible]

|      |     |       |     |   |   |     |     |     |     |   |   |   |     |     |
|------|-----|-------|-----|---|---|-----|-----|-----|-----|---|---|---|-----|-----|
| [62] | 139 | 83.45 | 53  | + | + | -   | +   | N/A | N/A | + | - | - | +   | +   |
| [63] | 101 | 89.11 | 49  | + | + | +   | +   | +   | +   | + | - | - | +   | -   |
| [64] | 30  | 80.00 | 50  | + | + | +   | +   | N/A | N/A | + | - | + | +   | -   |
| [65] | 32  | 75.00 | 43  | + | + | N/A | N/A | +   | +   | + | + | + | +   | +   |
| [66] | 100 | 82.00 | 48  | + | + | +   | +   | +   | +   | + | - | - | +   | +   |
| [67] | 90  | 91.11 | N/A | + | + | +   | +   | +   | +   | + | + | - | +   | +   |
| [68] | 82  | 82.93 | 51  | + | + | +   | +   | +   | +   | + | - | - | +   | -   |
| [69] | 17  | 94.12 | n/a | + | + | -   | +   | N/A | N/A | + | + | + | +   | +   |
| [70] | 142 | N/A   | 46  | + | + | +   | +   | N/A | N/A | + | - | + | +   | +   |
| [71] | 78  | N/A   | 47  | + | + | +   | +   | N/A | N/A | + | - | - | +   | -   |
| [72] | 372 | 76.34 | 48  | + | + | +   | +   | N/A | N/A | + | - | - | +   | +   |
| [73] | 242 | 71.07 | 48  | + | + | +   | +   | +   | +   | + | - | - | +   | +   |
| [74] | 53  | 77.36 | 48  | + | + | +   | +   | +   | +   | - | + | - | +   | +   |
| [75] | 95  | 80.00 | 41  | + | + | +   | +   | +   | +   | + | - | - | +   | -   |
| [76] | 139 | 81.29 | 47  | + | + | -   | +   | +   | +   | + | - | + | +   | +   |
| [77] | 170 | 90.00 | 47  | + | + | -   | +   | +   | +   | + | - | - | +   | +   |
| [78] | 42  | 78.57 | N/A | + | + | +   | +   | +   | +   | + | + | + | +   | -   |
| [79] | 32  | 84.38 | N/A | + | + | +   | +   | +   | +   | + | - | - | N/A | N/A |
| [80] | 100 | 85.00 | 43  | + | + | +   | +   | -   | -   | + | - | - | +   | -   |
| [81] | 91  | 86.81 | 47  | + | + | +   | +   | +   | +   | + | - | - | +   | -   |
| [82] | 185 | 77.30 | 51  | + | + | -   | +   | +   | +   | + | - | - | +   | N/A |
| [83] | 44  | 79.55 | 47  | + | + | -   | +   | +   | +   | + | - | + | +   | +   |
| [84] | 87  | 83.91 | 42  | + | + | +   | +   | +   | +   | - | - | + | +   | -   |
| [85] | 162 | 83.33 | 46  | + | + | -   | +   | +   | +   | + | - | - | +   | -   |
| [86] | 54  | 94.44 | 45  | + | + | -   | +   | N/A | N/A | + | - | - | +   | -   |
| [87] | 159 | 75.47 | 50  | + | + | +   | +   | +   | +   | + | - | - | +   | -   |
| [88] | 91  | 87.91 | N/A | + | + | -   | +   | +   | +   | + | - | - | +   | +   |
| [89] | 149 | 77.85 | 52  | + | + | -   | +   | +   | +   | + | - | - | +   | -   |
| [90] | 39  | 64.10 | 50  | + | + | -   | +   | +   | +   | + | - | - | +   | +   |

|       |     |       |    |   |   |   |   |     |     |   |   |   |     |   |
|-------|-----|-------|----|---|---|---|---|-----|-----|---|---|---|-----|---|
| [91]  | 39  | 94.87 | 51 | + | + | + | + | N/A | N/A | + | + | + | +   | - |
| [92]  | 70  | 78.57 | 47 | + | + | - | + | +   | +   | + | - | - | +   | + |
| [93]  | 15  | 66.67 | 51 | + | + | - | + | N/A | N/A | + | - | - | N/A | - |
| [94]  | 156 | 82.05 | 44 | + | + | + | + | +   | +   | + | - | - | +   | - |
| [95]  | 98  | 82.65 | 50 | + | + | - | + | +   | +   | + | - | - | N/A | - |
| [96]  | 155 | 81.29 | 46 | + | + | + | + | +   | +   | + | - | + | +   | + |
| [97]  | 16  | 87.50 | 44 | + | + | - | + | +   | +   | + | - | - | +   | + |
| [98]  | 163 | 80.37 | 47 | + | + | + | + | +   | +   | - | - | + | +   | - |
| [99]  | 156 | 82.69 | 47 | + | + | - | + | +   | +   | - | - | + | +   | - |
| [100] | 154 | 72.08 | 48 | + | + | + | + | +   | +   | + | - | + | +   | - |
| [101] | 110 | 82.73 | 47 | + | + | + | + | +   | +   | + | - | - | +   | + |

Abbreviations: E - Erenumab, F - Fremanezumab, G - Galcanezumab, ICHD-3 - International Classification of Headache Disorders, 3<sup>rd</sup>

edition. + reported, - not reported, N/A - information not available, EM - episodic migraine, CM - chronic migraine, MOH - medication overuse headache, ICD - International Statistical Classification of Diseases and Related Health Problems.

**Supplementary Table S2.** Outcome variables reported in clinic-based studies.

| Ref. | Baseline |     |       | Follow-up |     |       |                 |       |        |                      |                   |
|------|----------|-----|-------|-----------|-----|-------|-----------------|-------|--------|----------------------|-------------------|
|      | MMD      | MHD | MDwAM | MMD       | MHD | MDwAM | 50%<br>response | Pause | Switch | Disconti-<br>nuation | Adverse<br>events |
| [39] | -        | +   | -     | -         | +   | -     | +               | N/A   | +      | +                    | +                 |
| [40] | +        | +   | -     | -         | -   | -     | +               | N/A   | -      | -                    | N/A               |
| [41] | -        | +   | +     | -         | -   | -     | +               | +     | -      | +                    | +                 |
| [42] | +        | +   | -     | +         | +   | -     | +               | N/A   | -      | +                    | +                 |
| [43] | -        | +   | -     | -         | -   | -     | +               | N/A   | +      | +                    | +                 |
| [44] | -        | +   | +     | -         | +   | +     | +               | +     | -      | +                    | +                 |
| [45] | -        | +   | -     | -         | +   | -     | -               | N/A   | -      | +                    | +                 |
| [46] | +        | +   | -     | -         | -   | -     | +               | +     | +      | +                    | +                 |
| [47] | -        | -   | -     | -         | -   | -     | +               | N/A   | -      | -                    | +                 |
| [48] | +        | +   | -     | -         | -   | -     | +               | N/A   | -      | +                    | -                 |
| [49] | +        | -   | +     | -         | -   | -     | +               | N/A   | -      | +                    | +                 |
| [50] | +        | -   | -     | +         | -   | -     | +               | N/A   | -      | +                    | +                 |
| [51] | +        | -   | -     | +         | -   | -     | +               | +     | -      | +                    | +                 |
| [52] | -        | -   | -     | -         | -   | -     | +               | N/A   | +      | +                    | +                 |
| [53] | -        | -   | -     | -         | -   | -     | -               | N/A   | -      | +                    | +                 |
| [54] | +        | -   | +     | -         | -   | -     | +               | N/A   | -      | -                    | -                 |
| [55] | -        | +   | -     | -         | -   | -     | +               | N/A   | +      | +                    | +                 |
| [56] | -        | -   | -     | -         | -   | -     | -               | N/A   | -      | -                    | +                 |
| [57] | +        | +   | +     | -         | -   | -     | +               | +     | -      | +                    | +                 |
| [58] | -        | -   | -     | -         | -   | -     | +               | N/A   | -      | +                    | -                 |
| [59] | -        | -   | -     | -         | -   | -     | +               | N/A   | -      | -                    | -                 |
| [60] | +        | -   | -     | -         | -   | -     | +               | N/A   | -      | +                    | +                 |
| [61] | -        | +   | -     | -         | -   | -     | +               | +     | +      | +                    | -                 |
| [62] | -        | -   | -     | -         | -   | -     | +               | N/A   | -      | +                    | +                 |
| [63] | -        | -   | -     | -         | -   | -     | +               | N/A   | +      | +                    | +                 |

|      |   |   |   |   |   |   |   |     |   |   |     |
|------|---|---|---|---|---|---|---|-----|---|---|-----|
| [64] | + | - | + | + | - | + | + | N/A | + | + | +   |
| [65] | - | - | - | - | - | - | + | N/A | + | + | +   |
| [66] | - | - | - | - | - | - | + | +   | - | + | +   |
| [67] | - | - | - | - | - | - | + | +   | - | + | +   |
| [68] | - | + | - | - | - | - | + | N/A | - | - | -   |
| [69] | - | + | - | - | - | - | - | N/A | - | - | +   |
| [70] | - | - | - | - | - | - | + | N/A | - | + | +   |
| [71] | - | - | - | - | - | - | + | N/A | - | + | +   |
| [72] | - | - | - | - | - | - | + | +   | - | + | +   |
| [73] | - | - | - | - | - | - | + | +   | - | + | +   |
| [74] | + | - | - | - | - | - | + | N/A | - | - | +   |
| [75] | + | + | + | + | + | + | + | N/A | - | + | +   |
| [76] | - | - | - | - | - | - | + | N/A | - | + | +   |
| [77] | + | + | - | + | + | - | + | N/A | - | + | +   |
| [78] | - | - | - | - | - | - | + | N/A | - | - | +   |
| [79] | - | - | - | - | - | - | + | +   | - | + | N/A |
| [80] | + | - | + | + | - | + | + | N/A | - | + | +   |
| [81] | - | - | - | - | - | - | + | N/A | - | - | N/A |
| [82] | - | - | - | - | - | - | - | +   | - | + | N/A |
| [83] | + | - | + | - | - | - | + | +   | - | - | +   |
| [84] | - | + | + | - | + | + | + | N/A | - | + | +   |
| [85] | + | + | + | + | + | + | + | N/A | - | + | +   |
| [86] | + | + | - | - | - | - | + | N/A | - | + | +   |
| [87] | + | - | - | - | - | - | + | N/A | - | + | +   |
| [88] | - | - | - | - | - | - | + | N/A | - | + | +   |
| [89] | - | + | - | - | + | - | + | N/A | - | + | +   |
| [90] | - | - | - | - | - | - | + | N/A | - | - | +   |
| [91] | - | - | - | - | - | - | + | +   | + | - | -   |
| [92] | - | + | - | - | + | - | + | N/A | - | + | +   |

|       |   |   |   |   |   |   |   |     |   |   |   |
|-------|---|---|---|---|---|---|---|-----|---|---|---|
| [93]  | + | - | - | + | - | - | + | N/A | - | - | + |
| [94]  | - | - | - | - | - | - | + | +   | - | + | + |
| [95]  | - | - | - | - | - | - | - | +   | - | + | + |
| [96]  | + | + | + | + | + | + | + | N/A | - | - | + |
| [97]  | - | - | + | - | - | + | - | N/A | - | - | + |
| [98]  | - | - | - | - | - | - | + | N/A | - | + | - |
| [99]  | - | - | - | - | - | - | + | N/A | - | - | + |
| [100] | - | - | - | - | - | - | + | +   | - | + | - |
| [101] | + | - | - | + | - | - | + | N/A | - | - | + |

Abbreviations: + reported, - not reported, N/A not available, MMD monthly migraine days, MHD monthly headache days, MDwAM monthly days with acute medication.
